# Supplementary material
Source: PubMed Central journal article supplement (PMC2752527)
Supplement: 0908301106_0908301106SI.pdf [file 0908301106_0908301106SI.pdf]

# Supporting Information

Alterio et al. 10.1073/pnas.0908301106

|                                          | SIGNAL SEQUENCE                                                                                                                                          | HIS-TAG & PROTEASE SITE                                                                               | PG DOMAIN                                             |
|------------------------------------------|----------------------------------------------------------------------------------------------------------------------------------------------------------|-------------------------------------------------------------------------------------------------------|-------------------------------------------------------|
| CA IX                                    | MAPLCPSFWLPLLIIPAPAGLTVQLLLSLLLIMPVHPQRL                                                                                                                 | FRMQEDSPLGGSSGEDDPLGEEDLPSEEDSFRQEDDPGEEDLPGEEDLPGEEDLPVVKPKSEEGSLKLEDLPVEAFGDPQEPQNNHRDKEGDDQSHWR    |                                                       |
| P1                                       | MAPLCPSFWLPLLIIPAPAGLTVQLLLSLLLIMPVHPQRLHHHHHHHLLVPRGS                                                                                                   | QRLPRMQEDSPLGGSSGEDDPLGEEDLPSEEDSFRQEDDPGEEDLPGEEDLPGEEDLPVVKPKSEEGSLKLEDLPVEAFGDPQEPQNNHRDKEGDDQSHWR |                                                       |
| P2                                       | MAPLCPSFWLPLLIIPAPAGLTVQLLLSLLLIMPVHPQRLHHHHHHHLLVPRGS                                                                                                   |                                                                                                       | HRDKEGDDQSHWR                                         |
| P3                                       | MAPLCPSFWLPLLIIPAPAGLTVQLLLSLLLIMPVHPQRLHHHHHHHLLVPRGS                                                                                                   |                                                                                                       | DQSHWR                                                |
| P4                                       | MAPLCPSFWLPLLIIPAPAGLTVQLLLSLLLIMPVHPQRLHHHHHHHLLVPRGS                                                                                                   |                                                                                                       | DQSHWR                                                |
| CA DOMAIN                                |                                                                                                                                                          |                                                                                                       |                                                       |
| CA IX                                    | YGGDPPWPRVSPACAGRFQSPVDIRPQLAFCPALRPLELLGFQLPPLPELRRLRNNHSHVQLTLPGLMALGPGREYRALQILHWGAAGRFGSEHTVEGHRFPAEI                                                |                                                                                                       | VHLSLTAFAFARVDEALGRPGGLAVLAAFLEEPEENSAYEQLLSRLEETAEEG |
| P1                                       | YGGDPPWPRVSPACAGRFQSPVDIRPQLAFCPALRPLELLGFQLPPLPELRRLRNNHSHVQLTLPGLMALGPGREYRALQILHWGAAGRFGSEHTVEGHRFPAEI                                                |                                                                                                       | VHLSLTAFAFARVDEALGRPGGLAVLAAFLEEPEENSAYEQLLSRLEETAEEG |
| P2                                       | YGGDPPWPRVSPACAGRFQSPVDIRPQLAFCPALRPLELLGFQLPPLPELRRLRNNHSHVQLTLPGLMALGPGREYRALQILHWGAAGRFGSEHTVEGHRFPAEI                                                |                                                                                                       | VHLSLTAFAFARVDEALGRPGGLAVLAAFLEEPEENSAYEQLLSRLEETAEEG |
| P3                                       | YGGDPPWPRVSPACAGRFQSPVDIRPQLAFCPALRPLELLGFQLPPLPELRRLRNNHSHVQLTLPGLMALGPGREYRALQILHWGAAGRFGSEHTVEGHRFPAEI                                                |                                                                                                       | VHLSLTAFAFARVDEALGRPGGLAVLAAFLEEPEENSAYEQLLSRLEETAEEG |
| P4                                       | YGGDPPWPRVSPACAGRFQSPVDIRPQLAFCPALRPLELLGFQLPPLPELRRLRNNHSHVQLTLPGLMALGPGREYRALQILHWGAAGRFGSEHTVEGHRFPAEI                                                |                                                                                                       | VHLSLTAFAFARVDEALGRPGGLAVLAAFLEEPEENSAYEQLLSRLEETAEEG |
| TRANSMEMBRANE AND INTRACYTOSOLIC REGIONS |                                                                                                                                                          |                                                                                                       |                                                       |
| CA IX                                    | SETQVPLDISALLPSDFSRYFYEGSLITPPCAQGVIIWVFNQIVMLSAKQLHTLSDTLWGPDSRLQINFRATQPLNGRVIEASFPAQVDSPPRAAEVQVNSCLAAGDILALVPLGLFAVTSVAVLQVRRQHRRGITKGGVSYRPAEVAETGA |                                                                                                       |                                                       |
| P1                                       | SETQVPLDISALLPSDFSRYFYEGSLITPPCAQGVIIWVFNQIVMLSAKQLHTLSDTLWGPDSRLQINFRATQPLNGRVIEASFPAQVDSPPRAAEVQVNSCLAAGD                                              |                                                                                                       |                                                       |
| P2                                       | SETQVPLDISALLPSDFSRYFYEGSLITPPCAQGVIIWVFNQIVMLSAKQLHTLSDTLWGPDSRLQINFRATQPLNGRVIEASF                                                                     |                                                                                                       |                                                       |
| P3                                       | SETQVPLDISALLPSDFSRYFYEGSLITPPCAQGVIIWVFNQIVMLSAKQLHTLSDTLWGPDSRLQINFRATQPLNGRVIEASFPAQVDSPPRAAEVQVNSCLAAGD                                              |                                                                                                       |                                                       |
| P4                                       | SETQVPLDISALLPSDFSRYFYEGSLITPPCAQGVIIWVFNQIVMLSAKQLHTLSDTLWGPDSRLQINFRATQPLNGRVIEASF                                                                     |                                                                                                       |                                                       |

**Fig. S1.** Sequence alignment showing hCA IX and the different recombinant products P1, P2, P3, and P4. After protease treatment, the signal sequence and the His-tag (both shown in light gray) were removed from the proteins. The Cys/Ser mutation of P4 is shown in black. The catalytic His residues are highlighted in dark gray.

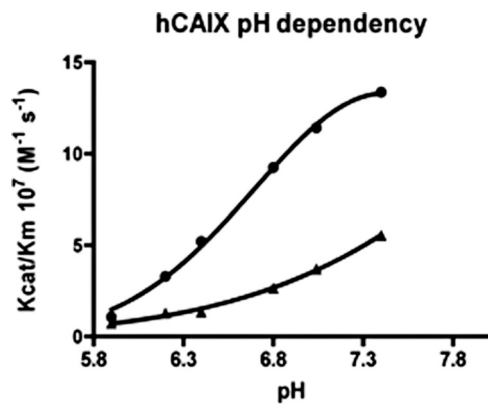

**Fig. S2.** Variation of  $k_{cat}/K_M$  for hCA IX recombinant forms (P1, indicated with filled circles, and P4, indicated with filled triangles) versus pH, for the  $\text{CO}_2$  hydration reaction at 25 °C. The titration curve of the P1 form has a  $\text{pK}_a$  of 6.49; that of the P4 form has a  $\text{pK}_a$  of 7.01.

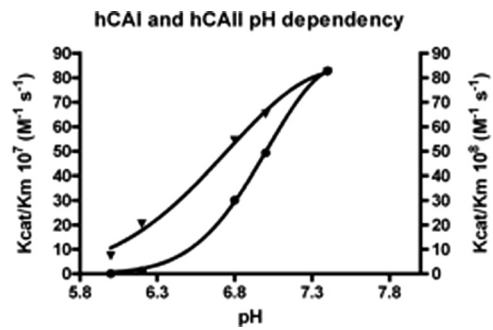

Fig. S3. Variation of  $k_{cat}/K_M$  for hCA I (inverted triangles) and hCA II (filled circles) versus pH, for the  $\text{CO}_2$  hydration reaction at 25 °C. A  $pK_a$  of 6.90 was obtained for the hCA I curve and of 7.10 for hCA II.
